# Supplementary material for: A highly effective “naked eye” colorimetric and fluorimetric curcumin-based fluorescent sensor for specific and sensitive detection of H2O2in vivo and in vitro
Source: Royal Society of Chemistry journal article supplement (doi:10.1039/d3an00340j), 2023-01-01
Supplement: d3an00340j1.pdf [file d3an00340j1.pdf]

## Supplementary materials

### **A highly effective “naked-eye” colorimetric and fluorimetric curcumin-based fluorescent sensor for specific and sensitive detection of H<sub>2</sub>O<sub>2</sub> in vivo and vitro**

Wenhao Du, Zheyu Shen, Yueying Liang, Shuai Gong, Zhiyuan Meng, Mingxing Li, Zhonglong Wang\*, Shifa Wang\*

*Co-Innovation Center of Efficient Processing and Utilization of Forest Resources, International Innovation Center for Forest Chemicals and Materials, College of Light Industry and Food, College of Chemical Engineering, Nanjing Forestry University, Nanjing, 210037, China*

\*Corresponding author: Dr. Zhonglong Wang;

Phone: +86-25-85428369; Fax: +86-25-85428369;

Email: [wang\\_zhonglong@njfu.edu.cn](mailto:wang_zhonglong@njfu.edu.cn)

\*Corresponding author: Dr. and Prof. Shifa Wang;

Phone: +86-25-85428369; Fax: +86-25-85428369;

Email: [wangshifa65@163.com](mailto:wangshifa65@163.com)

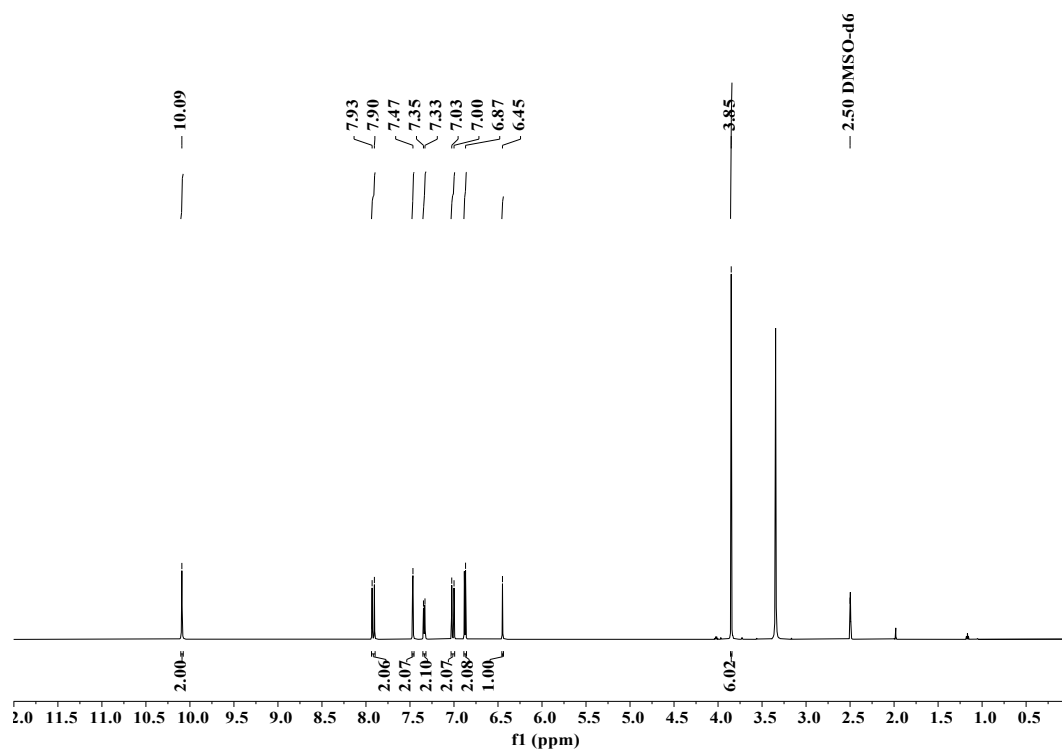

Fig. S1.  $^1\text{H}$  NMR spectra of DFC

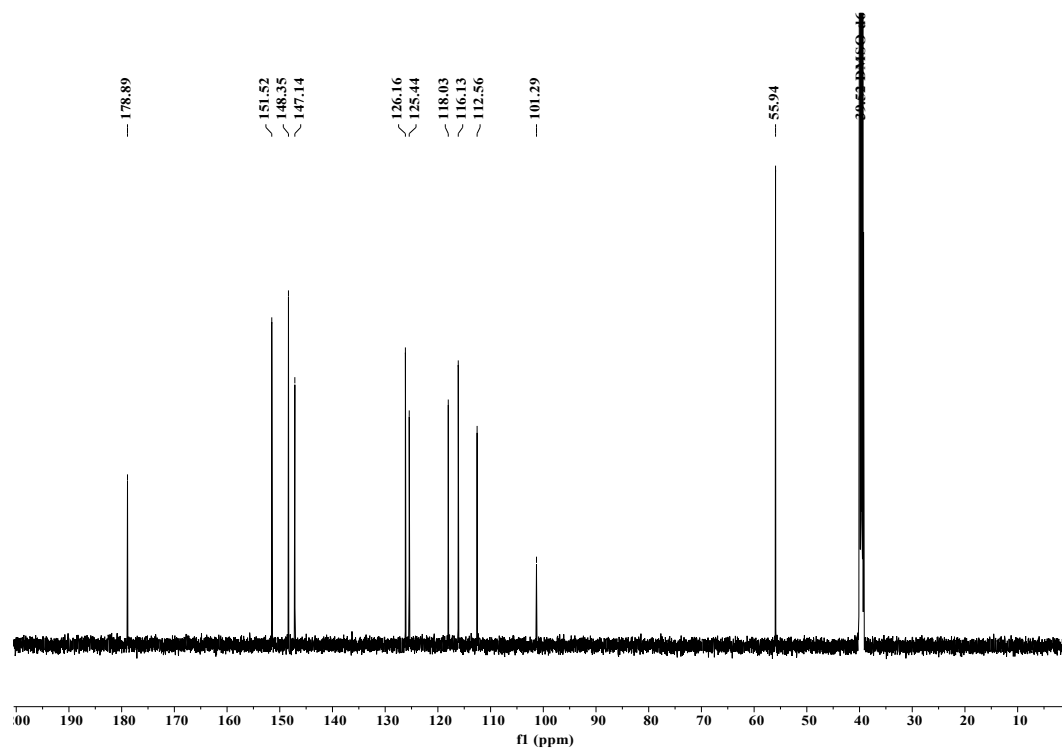

Fig. S2.  $^{13}\text{C}$  NMR spectra of DFC

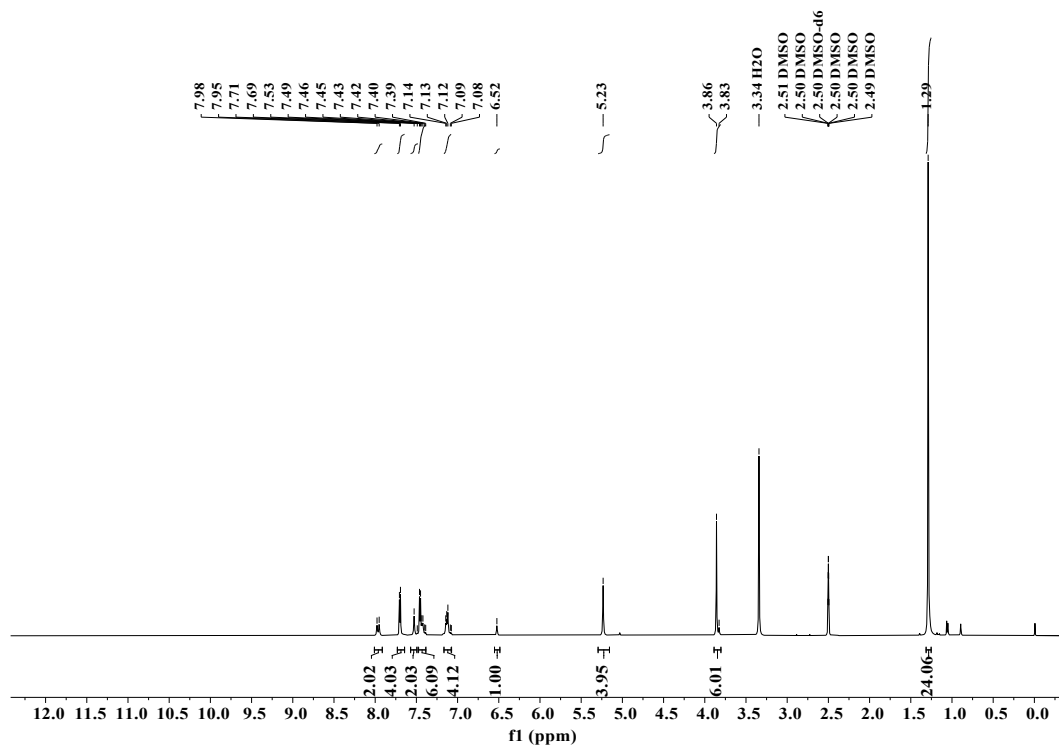

Fig. S3. <sup>1</sup>H NMR spectra of DFCB

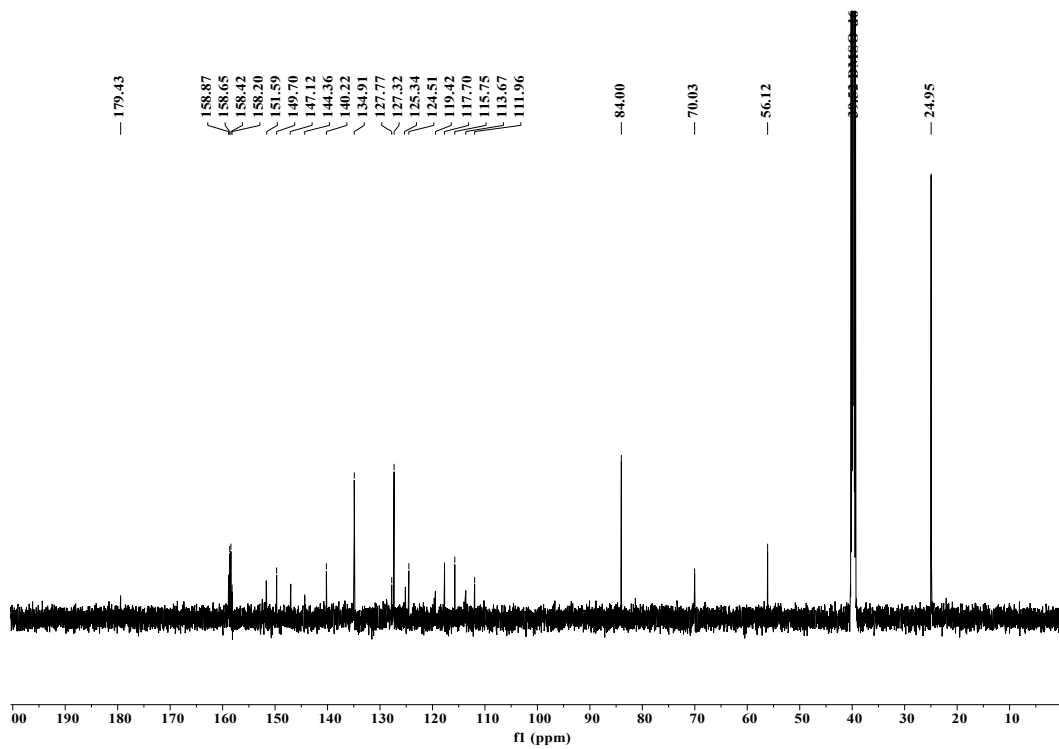

Fig. S4. <sup>13</sup>C NMR spectra of DFCB

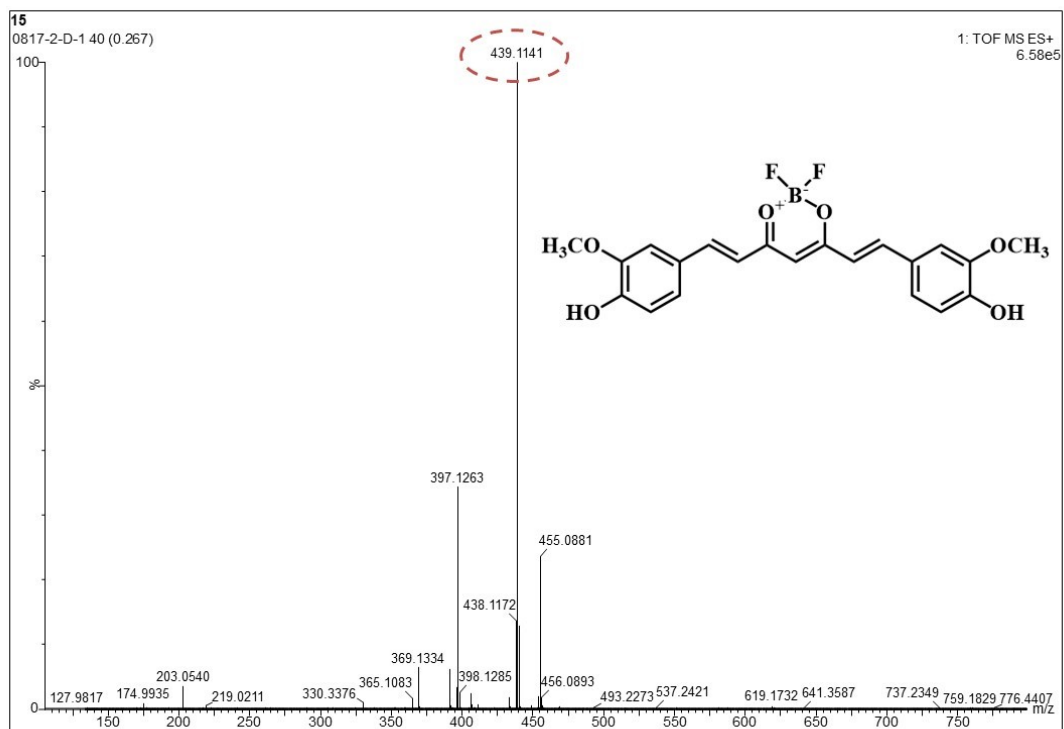

Fig. S5. HRMS of DFC

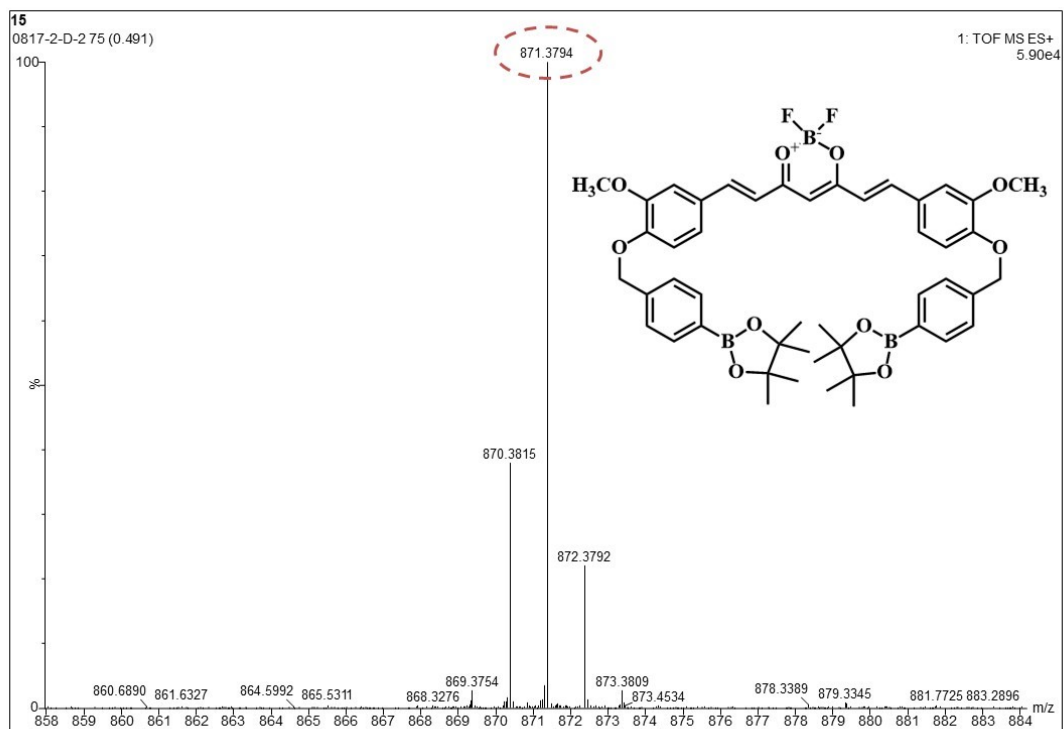

Fig. S6. HRMS of DFCB

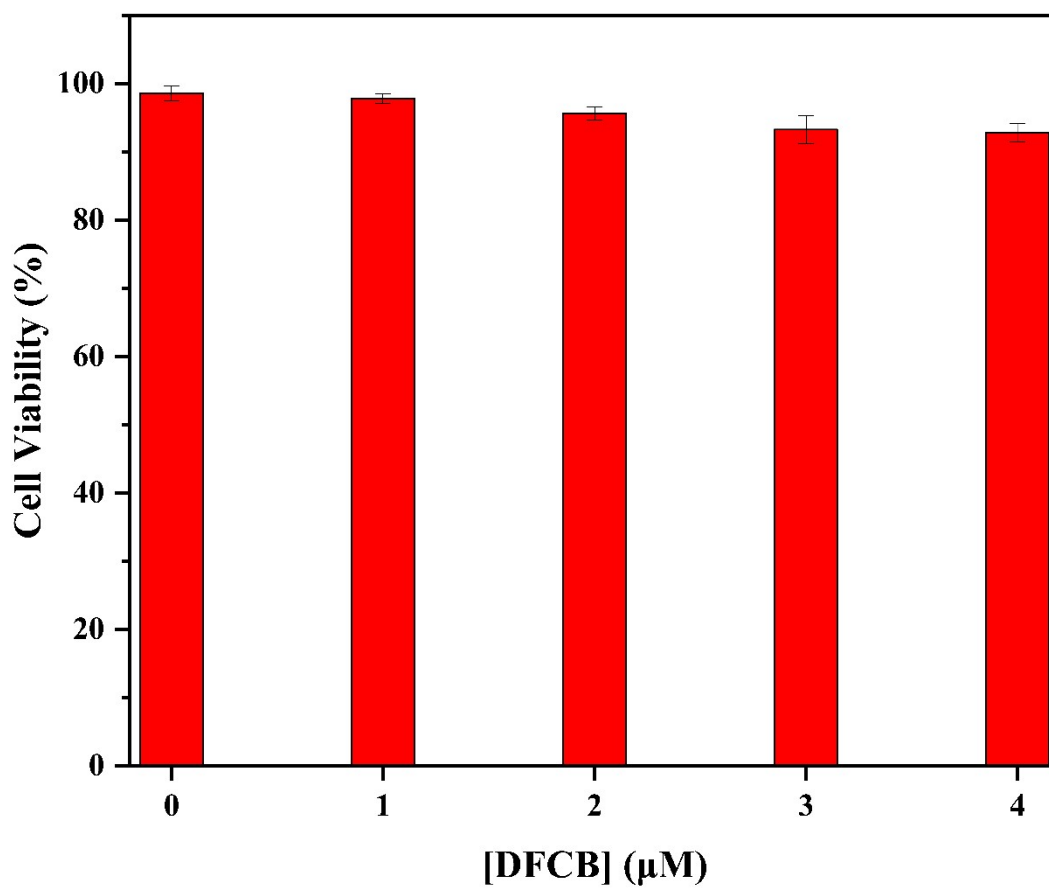

Fig. S7. Survival rate of HeLa cells treated with different concentrations of DFCB

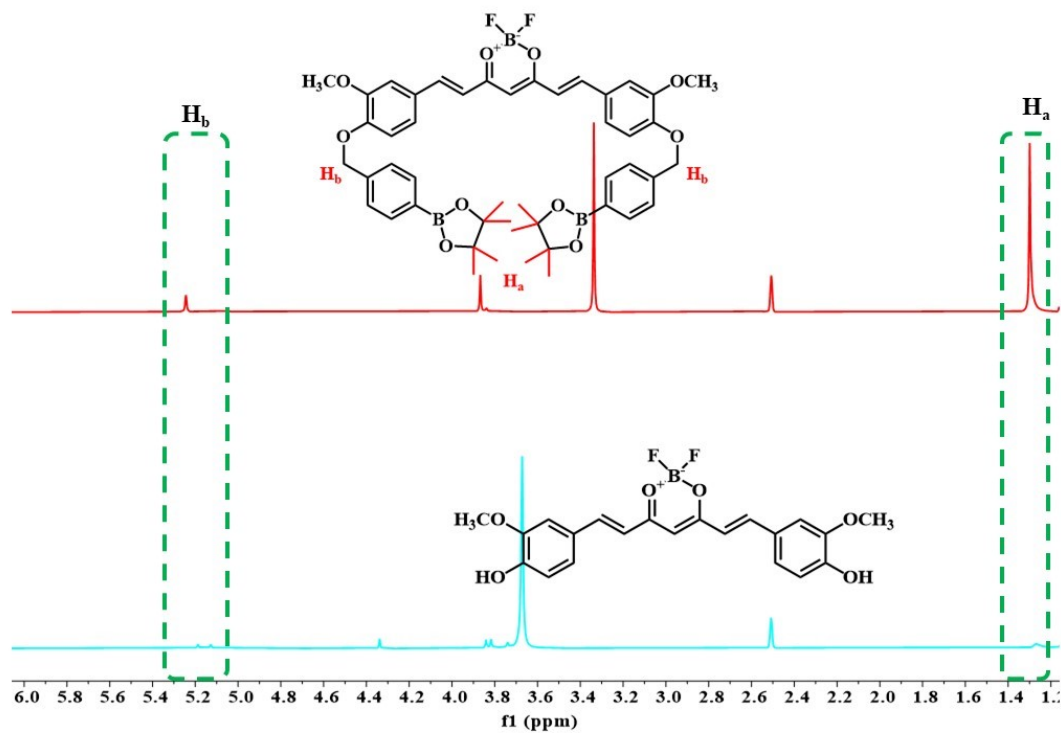

Fig. S8.  $^1\text{H}$  NMR analysis of DFCB reaction mechanism
